# Supplementary material for: Transcriptomic and Metabolomic Analyses Reveal Differences in Flavonoid Pathway Gene Expression Profiles between Two Dendrobium Varieties during Vernalization
Source: MDPI journal article supplement (doi:10.3390/ijms241311039), 2023-07-03
Supplement: s1 [file s1]

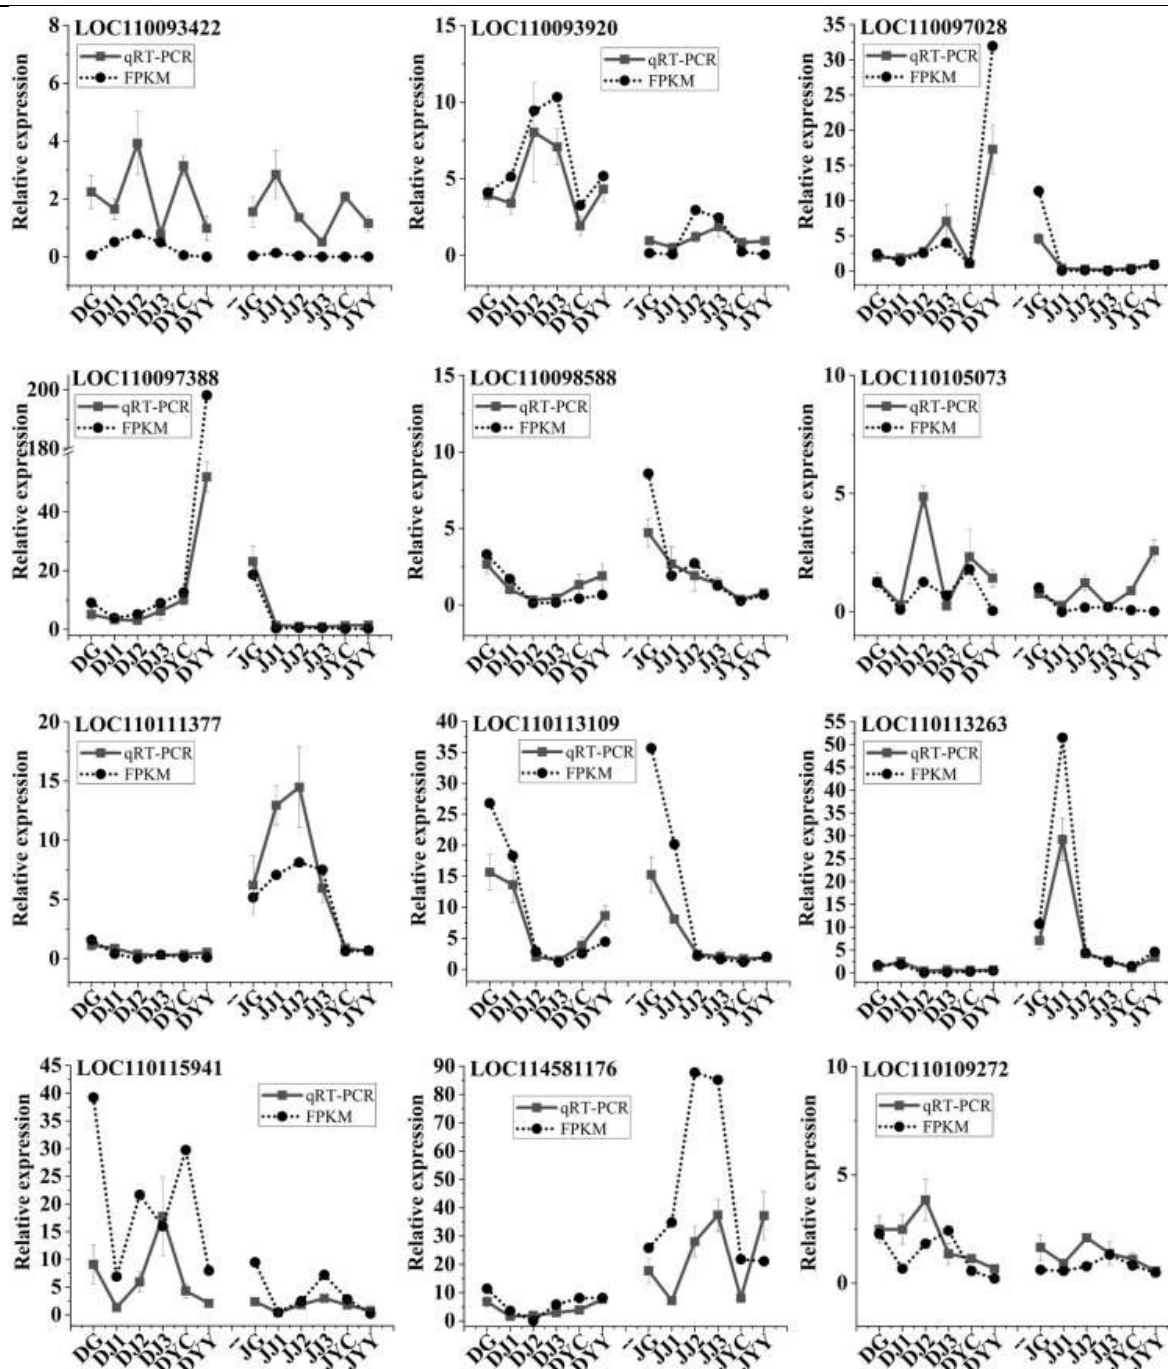

**Figure S1.** Verification of the expression patterns of RNA-seq results using qRT-PCR.

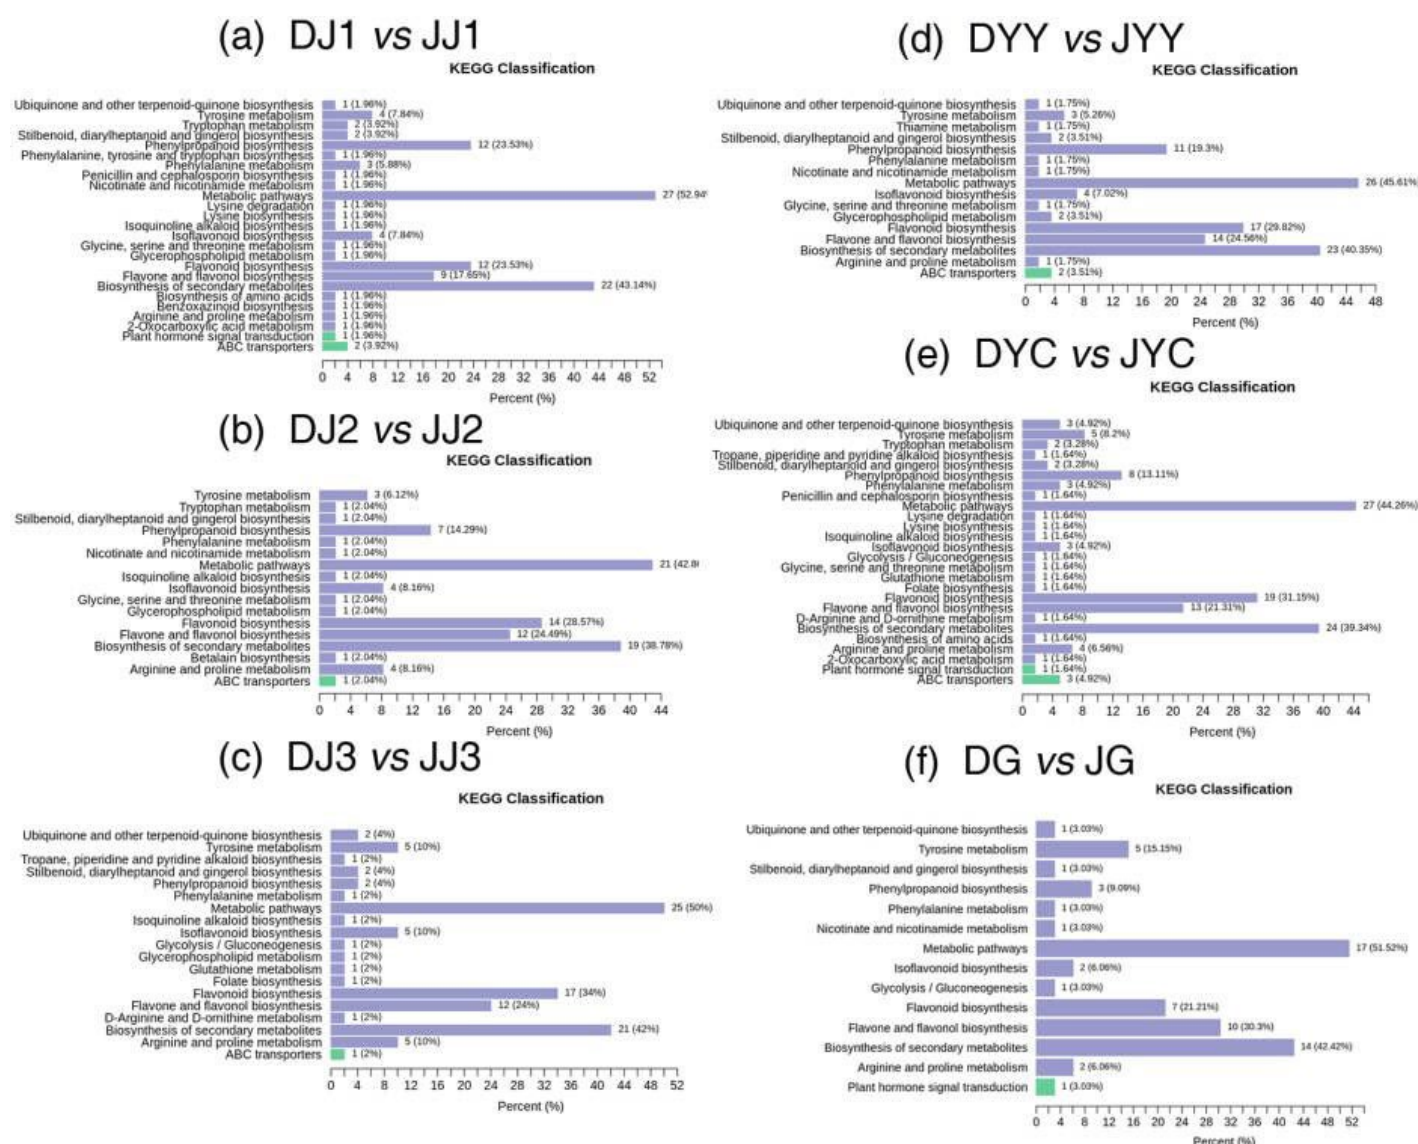

**Figure S2.** KEGG pathway analysis of DAMs. (a) DJ1 vs. JJ1; (b) DJ2 vs. JJ2; (c) DJ3 vs. JJ3; (d) DYY vs. JYY; (e) DYC vs. JYC; (f) DG vs. JG.
