# Supplementary material for: Transcriptomic and Metabolomic Analyses Reveal Differences in Flavonoid Pathway Gene Expression Profiles between Two Dendrobium Varieties during Vernalization
Source: MDPI journal article supplement (doi:10.3390/ijms241311039), 2023-07-03
Supplement: s1 [file s1]

**Table S1.** The primer sequences used in real-time quantitative PCR

| Genes                                             | Gene ID      | Primer sequence F (5' to 3') | Primer sequence R (5' to 3') |
|---------------------------------------------------|--------------|------------------------------|------------------------------|
| Flavonoid 3'-monooxygenase                        | LOC110113263 | GAACCGAGCAAAGAATCAA          | TCGAAAGGGCGTGTAGTGT          |
| Isoflavone 7-O-glucoside-6"-O-malonyltransferase  | LOC110111377 | ACCTCCCACTTCATACACC          | CGCCGATAAACTCAGCAAC          |
| Isoflavone 7-O-glucoside-6"-O-malonyltransferase  | LOC110098588 | AAACTACTTTGGGAACTGC          | ATCATCGCTTCTAACACCT          |
| Isoflavone 7-O-glucoside-6"-O-malonyltransferase  | LOC110109272 | CTTATTCAACCGCCGTCTT          | GTCACCGTCGGAGTTACAG          |
| p-Coumaroyl-CoA                                   | LOC110105073 | GCAGCCTAAGTCCCGCATCA         | CCGCCAGCGAAACAACCCCT         |
| Flavonol synthase 1                               | LOC110097028 | ATAAGTATGCGATGAAGGAA         | GAAAGGCTGAAACAAACAA          |
| Flavanone 3-dioxygenase F3H2                      | LOC110107388 | TGAAGCCAATGGATGTAAG          | TTTGAAAGTCGCCAAGATA          |
| Hydroxycinnamoyl transferase                      | LOC110113109 | CTTGGGTTCGAGCCTTGTG          | ACATTGGGTGATGTGGTGA          |
| Flavonol synthase 6                               | LOC114581176 | GCTCGGTATCAACGGTATG          | CTTCAGTTTATTCTGTGGG          |
| Putrescine hydroxycinnamoyl transferase 1         | LOC110093422 | TTCGTCCCGTACTAAAGCCAGTT      | CTAACCTCCGCACAGCACTCG        |
| Flavonoid 3'-monooxygenase                        | LOC110115941 | CTCATATTCGCCCACTACGG         | GCACGCACTTATTCCATCAC         |
| Dihydroflavonol 4-reductase/flavanone 4-reductase | LOC110093920 | GGCAGCAAGTCTAAGTGAT          | GAACCGAGGAAGTTAGGAA          |
| TBP (TATA box binding protein like)               | AT1G55520.1  | GGCATCCTTCTGGTATTGTCC        | TACGAGCATACTCCGAGCAG         |
